# Supplementary material for: New indoor navigation system for visually impaired people using visible light communication
Source: Springer Nature journal article supplement (doi:10.1186/1687-1499-2013-37), 2013-02-19

LED downlight

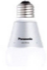

Location-based Information  
by visible light communication

Headphone

receiver all-in-one smartphone

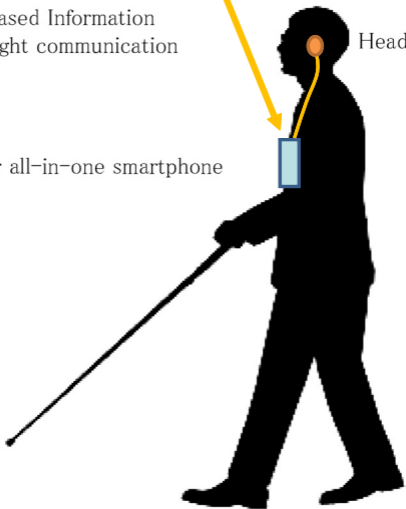

Supplement: 13638_2012_575_MOESM1_ESM.pdf [file 13638_2012_575_MOESM1_ESM.pdf]
