# Supplementary material for: New indoor navigation system for visually impaired people using visible light communication
Source: Springer Nature journal article supplement (doi:10.1186/1687-1499-2013-37), 2013-02-19
Supplement: 13638_2012_575_MOESM3_ESM.pdf [file 13638_2012_575_MOESM3_ESM.pdf]

1. Lat/Long is received from LED light  
(ex: north latitude 34.63793, east longitude 135.41188)

2. Direction of a smart phone is received from an geomagnetic sensor  
(ex:  $115.01^{\circ}$  )

3. Correction of a geomagnetic sensor value  
( $-10^{\circ}$  )

4. Next, lat/long is received from LED light  
(ex: north latitude 34.63796, east longitude 135.41191)

5. The next direction and distance of LED lighting are calculated  
from a current position.  
(ex:  $306^{\circ}$  /The 10:00 direction 4m)
