# Supplementary material for: New indoor navigation system for visually impaired people using visible light communication
Source: Springer Nature journal article supplement (doi:10.1186/1687-1499-2013-37), 2013-02-19

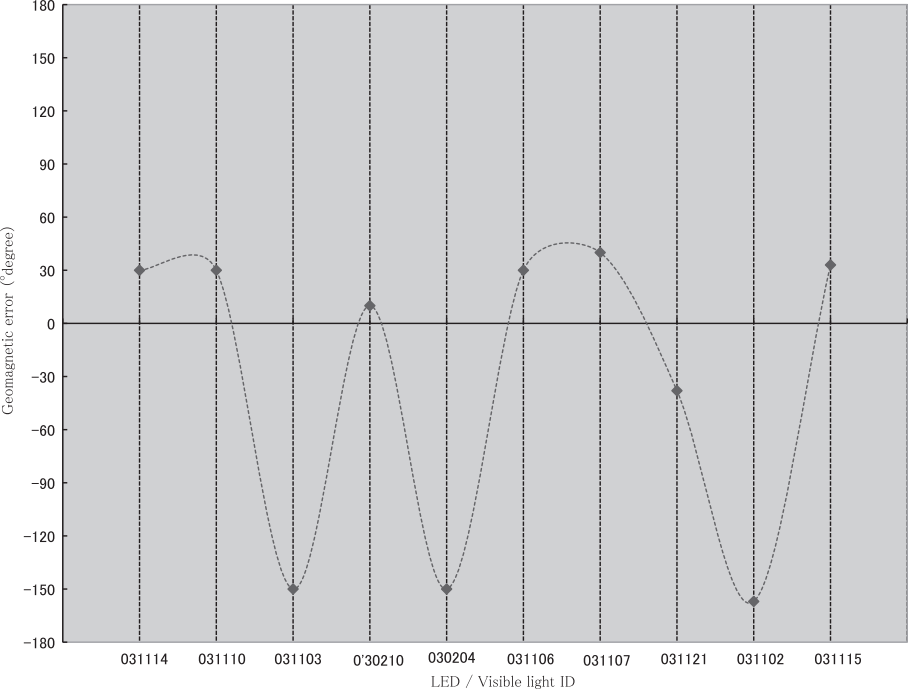

Supplement: 13638_2012_575_MOESM7_ESM.pdf [file 13638_2012_575_MOESM7_ESM.pdf]
